# Supplementary material for: Guillain-Barré syndrome and COVID-19: an observational multicentre study from two Italian hotspot regions
Source: HighWire-hosted journal article supplement (doi:10.1136/jnnp-2020-324837), 2020-11-06
Supplement: jnnp-2020-324837supp001_data_supplement.pdf [file jnnp-2020-324837supp001_data_supplement.pdf]

## Supplemental material

**Table 1. Criteria set employed for electrodiagnosis of GBS subtypes on the basis of a single test.**<sup>1-3</sup>

| AIDP                                                                                                                                                                                                                                                                                                                                                                                                                                                                                                                          | AMAN                                                                                                                                                                                                                                                                                                                                                                                      | AMSAN                                                                                                                                                         | UNEXCITABLE                                                                                     | EQUIVOCAL                                                                      |
|-------------------------------------------------------------------------------------------------------------------------------------------------------------------------------------------------------------------------------------------------------------------------------------------------------------------------------------------------------------------------------------------------------------------------------------------------------------------------------------------------------------------------------|-------------------------------------------------------------------------------------------------------------------------------------------------------------------------------------------------------------------------------------------------------------------------------------------------------------------------------------------------------------------------------------------|---------------------------------------------------------------------------------------------------------------------------------------------------------------|-------------------------------------------------------------------------------------------------|--------------------------------------------------------------------------------|
| <p>At least one of the following in at least two nerves:</p> <ul style="list-style-type: none"> <li>▶ MCV &lt;70% LLN</li> <li>▶ DML&gt;130 % ULN</li> <li>▶ dCMAP duration &gt;120% ULN</li> <li>▶ pCMAP/dCMAP duration ratio &gt;130%</li> <li>▶ F-response latency&gt;120% ULN</li> </ul> <p>Or one of the above in one nerve, plus:</p> <ul style="list-style-type: none"> <li>▶ Absent F waves in two nerves with dCMAP &gt; 20% LLN</li> <li>▶ Abnormal ulnar SNAP amplitude and normal sural SNAP amplitude</li> </ul> | <p>None of the AIDP features in any nerve (demyelinating features allowed in one nerve if dCMAP &lt;20% LLN)</p> <p>And at least one of the following in each of two nerves:</p> <ul style="list-style-type: none"> <li>▶ dCMAP&lt;80% LLN</li> <li>▶ pCMAP/dCMAP amplitude ratio &lt;0.7 (excluding tibial nerve)</li> <li>▶ Isolated F wave absence (or &lt;20% persistence)</li> </ul> | <p>▶ Same criteria as AMAN in motor nerves, plus:</p> <ul style="list-style-type: none"> <li>▶ SNAP amplitudes &lt; 50% LLN in at least two nerves</li> </ul> | <p>▶ Distal CMAP absent in all nerves (or present in only one with distal CMAP &lt;10% LLN)</p> | <p>▶ Abnormal findings not fulfilling specific criteria for other subtypes</p> |

Legend: AIDP, acute inflammatory demyelinating polyradiculoneuropathy; AMAN, acute motor axonal neuropathy; AMSAN, acute motor and sensory axonal neuropathy; ULN, upper limit of normal; LLN, lower limit of normal; DML, distal motor latency; MVC, motor conduction velocity; CMAP, compound muscle action potential; dCMAP, distal compound muscle action potential; pCMAP/dCMAP ratio between proximal and distal amplitude compound muscle action potential; SNAP, sensory nerve action potential.

- 1) Uncini A, Ippoliti L, Shahrizaila N, Sekiguchi Y, Kuwabara S. Optimizing the electrodiagnostic accuracy in Guillain-Barré syndrome subtypes: Criteria sets and sparse linear discriminant analysis. *Clin Neurophysiol* 2017;128:1176-83
- 2) Uncini A, Kuwabara S. The electrodiagnosis of Guillain-Barré syndrome subtypes: where do we stand? *Clin Neurophysiol* 2018; 29: 2586-93
- 3) Uncini A, González-Bravo DC, Acosta-Ampudia YY, Ojeda EC, Rodríguez Y, Monsalve DM, et al. Clinical and nerve conduction features in Guillain-Barré syndrome associated with zika virus infection in Cúcuta, Colombia. *Eur J Neurol* 2018.25:644-50
